## Effects of Cr stress on bacterial community structure and diversity in rhizosphere soils of *Iris pseudacorus*

Zhao Wei<sup>1,2</sup>, Zhu Sixi<sup>1\*</sup>, Yang Xiuqing<sup>1</sup>, Xia Guodong<sup>1</sup>, Wang Baichun<sup>1</sup>, Gu Baojing<sup>2\*\*</sup>

<sup>1</sup> College of Eco-environment Engineering, Guizhou Minzu University; The Karst Environmental Geological Hazard Prevention of Key Laboratory of State Ethnic Affairs Commission, Guiyang 550025, China.

<sup>2</sup> College of Environment and Resources Science, Zhejiang University, Hangzhou 310058, China.

**Abstract:** Rhizosphere microorganisms play an important role in improving soil microenvironment, which contributes to plant growth under heavy metal stress. However, the effect of chromium (Cr) on plant rhizosphere bacterial community is still unknown. In this paper, sole-cultivated pattern, two-cultivated pattern and three-cultivated pattern, combined with 16S rRNA high-throughput sequencing technology, the effects of Cr stress on bacterial community structure and diversity in rhizosphere soil of *Iris Pseudacorus* were analyzed. The results showed that under Cr stress, *I. Pseudacorus* showed good tolerance and enrichment. However, under Cr stress, the Alpha diversity indices (Shannon, Chao and Sobs) of rhizosphere bacterial community decreased by 9.1%, 30.3% and 28.0% on average, respectively. The change of bacterial community was 22.6% due to Cr stress, and the common species of bacterial community decreased by 4.2%. Proteobacteria, Actinobacteria, Acidobacteria, Firmicutes and Gemmatimonadetes accounted for more than 78.2% of the total sequence. With the increase of plant diversity, Bacteroides and Pseudomonas appeared successively, and the abundance of the dominant species increased obviously. Through the symbiotic network diagram, it was found that the synergistic effect between dominant species in two-cultivated pattern was significantly enhanced, and the soil microenvironment was significantly improved. In conclusion, the results of this study will provide a reference for understanding the response of rhizosphere bacterial community to heavy metal Cr and the interaction between wetland plants and rhizosphere bacteria during wetland phytoremediation.

**Keywords:** Cr stress; Rhizosphere bacterial community; *Iris pseudacorus*; 16S rRNA sequencing technology; Phytoremediation

---

\*Corresponding author at: College of Eco-environment Engineering, Guizhou Minzu University, Guiyang 550025, China.

E-mail address: zhusixi2011@163.com (S. Zhu).

## 44 Graphical Abstract

45

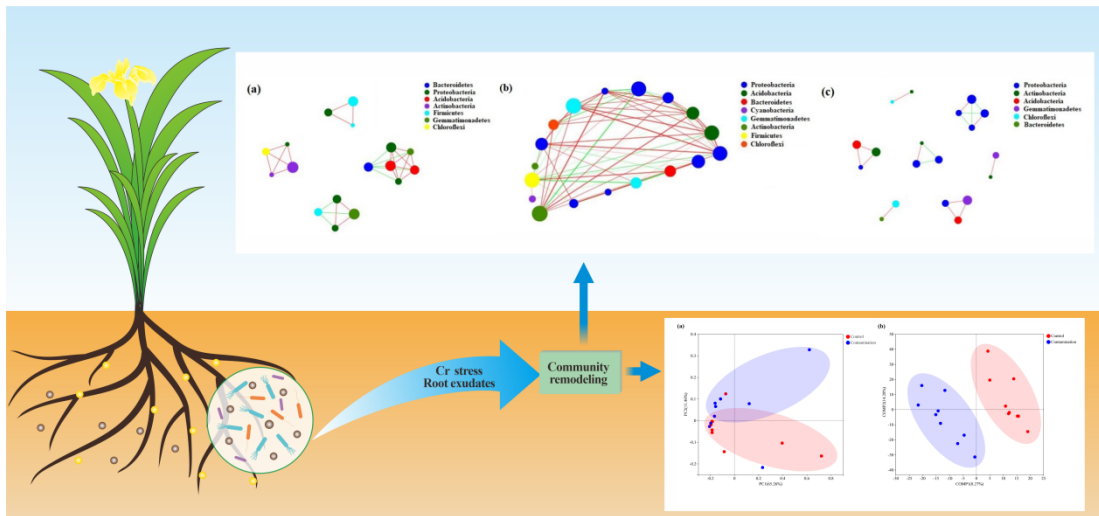

46

47

## 48 1. Induction

49 In recent years, due to the influence of human activities, heavy metal chromium (Cr) is  
50 widely distributed in soils and water bodies, and its environmental pollution has become a  
51 hotspot of concern (Xing et al., 2021). In addition to excessive exploitation of resources (Amit  
52 et al., 2018), Cr in the environment also mainly comes from metallurgy, electroplating,  
53 dyeing, tanning and other industrial fields (Zaheer et al., 2020). The most stable and common  
54 forms in nature are trivalent Cr(III) and hexavalent Cr(VI) (Kimbrough et al., 1999).  
55 Compared with Cr(VI), Cr(III) has weaker mobility, lower bioavailability and toxicity (Panda  
56 et al., 2005), and can also be used as an important component of glucose tolerance factor at  
57 low concentrations, which be beneficial to animal and human health (Losi et al., 1994). Due  
58 to its high fluidity and membrane permeability (Aashna et al., 2022), Cr(VI) has caused great  
59 harm to soil animals, microorganisms and plants (mainly manifested as soil degradation,  
60 microbial reduction and plant productivity decline (Peng et al., 2020). Ultimately, it will have  
61 a serious impact on human health through the food chain (Lin et al., 2020).

62 Cr hardly participates in any metabolic functions in plants, but it is potentially toxic and  
63 can produce toxic effects on plants (Wang et al., 2021). For example, as the Cr concentration  
64 gradient increases, Photosynthetic pigments (chlorophyll, carotenoids) (Rai et al., 2004), The  
65 synthesis of 1-aminocyclopropane-1-carboxylic acid and indoleacetic acid (Yaashikaa et al.,  
66 2022) will be inhibited, causes oxidative stress and enhances the synthesis of superoxide  
67 dependent on nicotinamide adenine dinucleotide phosphohate (NADPH) (Guo et al., 2020). It  
68 affects the absorption of nutrient elements and water balance, and ultimately inhibits seed  
69 germination and root growth (Guo et al., 2020). The activity of antioxidant enzymes is  
70 reduced and membrane lipid peroxidation is enhanced, which leads to plant death (Hu et al.,  
71 2020).

72 The rhizosphere soil of plants is rich in microbial diversity. Rhizosphere microbiota is an  
73 important regulator of plant growth and stress resistance (Salas-Gonzalez et al., 2020).  
74 Rhizosphere microorganisms can increase carbon content in plant roots (Lange et al., 2015;  
75 Domeignoz-horta et al., 2020), nitrogen (N) (Zhang et al., 2019) and phosphorus (P)  
76 (Sundaresan et al., 2019) promote plant growth under adverse environment. It also affects the

77 dynamic balance of plant antioxidant mechanism and adaptation to Cr stress (Guo et al.,  
78 2020). Moreover, rhizosphere growth-promoting bacteria (PGPR) can promote plant growth  
79 by dissolving mineral nutrients, secreting siderophore, indoleacetic acid and hydrocyanic acid,  
80 and release organic acids and biosurfactants to reduce the bioavailability and toxicity of Cr in  
81 soil, so as to improve plant tolerance. Promote growth on plants (Gupta et al., 2019). At  
82 present, *Klebsiella variicola* H12-CM-Fes@ (Yu et al., 2021a) and microbacterium  
83 *Testaceum B-HS2* (Amina et al., 2019), *Sporosarcina Saromensis W5* (Huang et al., 2021)  
84 and *Bacillus* sp. CRB-B1 (Tan et al., 2020) have been identified with high efficiency in  
85 removing chromium. Therefore, the use of bioremediation to reduce the toxic effect of Cr in  
86 the environment has a great prospect in the future (Muthusarayanan et al., 2018).

87 *Iris pseudacorus* is widely distributed in ponds and wetlands, and has been widely used  
88 in the remediation of Cr-contaminated soil due to its fast growth, high biomass, strong stress  
89 resistance, and strong tolerance and enrichment of heavy metals (Lin et al., 2018). Moreover,  
90 most wetland plants can fix Cr in their cell walls and vacuoles to reduce the toxicity of Cr to  
91 themselves (Wang et al., 2021). However, most studies focused on the mechanism of Cr  
92 removal by plants and the oxidative stress of Cr on plants, and there were few reports on the  
93 effect of Cr stress on the bacterial community structure and composition in the rhizosphere of  
94 *I. pseudacorus*. In this study, based on 16S rRNA high-throughput gene sequencing  
95 technology, we analyzed the physical and chemical properties of rhizosphere soil, the  
96 composition and diversity index of bacterial communities and the symbiotic network  
97 relationship between bacterial communities. And this study explored the mechanism of  
98 chromium stress on the structure and diversity of rhizosphere bacterial community. The  
99 results are of great significance for further understanding the response mechanism of  
100 rhizosphere bacteria to Cr stress in wetland plants and the mutual protection mechanism  
101 between *I. pseudacorus* and rhizosphere bacteria in Cr contaminated soil.

102

## 103 2. Materials and methods

### 104 2.1 Experimental design

105 *I. pseudacorus* were cultivated by greenhouse pot experiment with the flooded condition.  
106 Each pot contained 20 kg of soil collected from a karst mountain in southwestern China  
107 (106°37'36"E, 26°22'26"N), and multi-point mixed sampling was conducted to take soil  
108 samples from depths of 0-20 cm. Large chunks of weed stones were removed and passed  
109 through a 2 mm sieve. The pot of sole-cultivated pattern (IPI), two-cultivated pattern (IPII),  
110 three-cultivated pattern (IPIII) were designed as Control group (original soil samples without  
111 Cr contaminated) and Contaminated group (the exogenous addition of 0.1 mmol L<sup>-1</sup> K<sub>2</sub>Cr<sub>2</sub>O<sub>7</sub>  
112 solutions made Cr(VI) content to be 200 mg kg<sup>-1</sup> in the soil), and the un-planted blank  
113 samples (CK), Each group had three replicates. Details of experimental grouping arrangement  
114 were shown in Fig. S1. The greenhouse ensured a constant temperature of 25 °C and moisture  
115 content of 50%, which reduced the interference of micro-meteorological factors on plant  
116 growth.

### 117 2.2 Sampling and chemical analysis

118 The pot culture started from the seedling (20-30 cm), and Cr(VI) was added to the  
119 pollution group after 30 days of domestication. After 3 months of pot experiment, destructive  
120 samples were taken. Randomly selected plants in potted plants were removed from the soil  
121 and collected the soil attached to the primary root (served as rhizosphere soil), and  
122 refrigerated to preserve the selected plants (Zhang et al., 2017); CK groups were potted to

123 take soil samples of 0-5 cm from the upper layer. All of the samples were taken three times  
124 each time, totally 21 samples. Finally, samples were frozen at -20 °C for DNA extraction, high  
125 throughput sequencing and determination of Cr content.

126 The Cr contents of plants were measured by atomic absorption spectrophotometer  
127 (Perkin Elmer Analyst 800, USA). Soil physicochemical properties (SOM、pH、EC) were  
128 analyzed by the methods of Soil Agrochemical Analysis (Bao, 2000). Total genomic DNA  
129 from the rhizosphere soils were extracted and 16S rRNA sequenced following the  
130 manufacturer instructions and sent Majorbio Bio-pharm Technology, Shanghai for sequencing  
131 (Wang et al., 2021).

### 132 **2.3 Statistical analysis**

133 Normality and homogeneity of data were tested by KolmogorovSmirnov and Levene's  
134 test. The data that did not obey a normal distribution were transformed by the natural  
135 logarithm. The weighted UniFrac distance algorithm was used to analyze the principal  
136 coordinates (PCoA), and the least square discriminant method (PLS-DA) was used to analyze  
137 and map (Wang et al., 2021). Analysis of variance (ANOVA) and the Mann-Whitney U test  
138 The significance of soil physicochemical parameters, plant physiological parameters and  
139 diversity index under chromium stress were tested. All statistical analyses were performed  
140 using SPSS statistical package (26.0) and Origin (2021). All the figures were prepared using  
141 Adobe Illustrator CC 2019 and Adobe Photoshop CC 2019 and Origin 2021.

142

## 143 **3. Results**

### 144 **3.1 Soil physical and chemical properties and plant physiological parameters**

145 In this study, after exogenous chromium addition, EC and pH values in soils increased  
146 by 16.6% and 5.0% respectively compared with the control group, among which, chromium  
147 treatment significantly increased SOM content in soil by 9.2% (Figure 1). In addition, the  
148 physiological parameters of plants were significantly changed after chromium was added. The  
149 Fresh weight of plants decreased by 45.1% on average, and the chromium content in roots and  
150 leaves increased by 97.1% and 99.5%, respectively (Figure. 1). It is noteworthy that after Cr  
151 stress, the Cr content in leaves of *I. pseudacorus* was significantly higher than that in roots,  
152 and the transfer factor reached 2.01. In conclusion, although Cr stress can destroy plant  
153 growth environment and inhibit plant growth, *I. pseudacorus* has a good enrichment effect  
154 and a certain tolerance to Cr.

### 155 **3.2 Diversity index of soil bacterial community**

156 In this study, unrecognized gene base sequences and chimeras were removed from the  
157 samples by high-throughput sequencing technology, and the Alpha diversity index of  
158 rhizosphere bacterial community of *I. pseudacorus* was analyzed (Figure 2). A total of  
159 1239,259 valid sequences were obtained, and 2756 bacterial taxa (i.e. OTUs) were identified,  
160 among which the coverage of OTU sequences was above 98%. In addition, dilution curves  
161 were drawn according to Alpha diversity index, and it could be seen that the slopes of all  
162 sample curves were close to saturation (Figure. S2). Under Cr stress, the rhizosphere bacterial  
163 community Shannon index, Chao index and Sobs index of *I. pseudacorus* decreased by 9.1%,  
164 30.3% and 28.0% on average compared with the control group (Figure 2), respectively. It can  
165 be seen that exogenous Cr supplementation significantly reduced the Alpha diversity index of  
166 bacterial community in rhizosphere soils of *I. pseudacorus*.

### 167 **3.3 Soil bacterial community structure and composition**

168 Veen diagram showed that the number of species co-existed in the control group and the

169 polluted group was 17.0% and 16.4% respectively (Figure. S3a and b). Compared with the  
170 control group, the number of species co-existed in the Cr polluted group decreased by 4.2%.  
171 PCoA based on OTU taxonomy level showed that the bacterial community structure of the  
172 control group and the contaminated group were significantly different, and there were  
173 significant differences in spatial and temporal distribution pattern (Figure 3a). Among them,  
174 the difference explanation rates of the first principal component (PCoA1) and the second  
175 principal component (PCoA2) were 65.3% and 11.5%, respectively. Further PLS-DA analysis  
176 showed that the bacterial community changed by 22.6% due to chromium addition (Figure  
177 3b). These verified that the addition of exogenous chromium could significantly affect the  
178 spatial pattern and composition of bacterial community.

179 In this study, a total of 2756 bacterial taxa were identified, belonging to 37 phyla, 88  
180 classes and 798 genera. The dominant phyla were Proteobacteria (average relative abundance  
181 38.9%), Actinobacteria (14.2%), Acidobacteria (9.2%), Firmicutes (8.0%),  
182 Gemmatimonadetes (7.9%) and Chlo Roflexi (7.5%), Bacteroidetes (5.9%) and Bacteroidetes  
183 (Figure 4a). Compared with the blank group, Bacteroides and Pseudomonas were the  
184 dominant newly emerged bacteria (Figure 4b). Proteobacteria showed an obvious upward  
185 trend compared with the control group and the blank group under Cr stress in two-cultivated  
186 pattern. In addition, Proteobacteria, Actinobacteria, Firmicutes and Bacteroidetes showed an  
187 obvious upward trend in overall abundance compared with the blank group in the process of  
188 increasing plant diversity. Acidobacteria, Gemmatimonadetes and Chloroflexi showed a  
189 downward trend. It should be noted that Bacteroides increased first and then decreased during  
190 the increase of plant diversity, and the abundance of Bacteroides was the highest in  
191 sole-cultivated pattern under chromium stress. Among them, the new dominant bacteria in  
192 two-cultivated pattern that showed an obvious upward trend under Cr stress was  
193 Pseudomonas.

194 Further, the changes of dominant species under different cultivation modes were  
195 compared through the histogram of species abundance difference (Figure S4 a-d). We found  
196 that the abundance of Gammaproteobacteria, Actinobacteria and Alphaproteobacteria among  
197 the dominant strains of sole-cultivated pattern under chromium stress did not decrease, but  
198 showed an upward trend. Among them, Clostridia and Bacteroidia showed a decreasing trend.  
199 Under Cr stress in two-cultivated pattern, Gammaproteobacteria and Alphaproteobacteria  
200 showed the same upward trend, while Actinobacteria and Gemmatimonadetes showed a  
201 downward trend. Under Cr stress in three-Cultivated pattern, the abundance of Actinobacteria,  
202 Gammaproteobacteria and Gemmatimonadetes showed an upward trend, while  
203 Deltaproteobacteria showed a downward trend. On the whole, with the increase of plant  
204 diversity, the abundance of dominant species showed an obvious increase trend. Moreover,  
205 compared with the control group, the addition of plants significantly improved the abundance  
206 of dominant bacterial species in soil microenvironment.

### 207 **3.4 Interspecific relationship of soil bacterial community**

208 The symbiotic network diagram reflects the coexistence pattern of bacterial communities  
209 in specific habitats and explores the interspecific relationship of soil bacterial communities  
210 under Cr stress. Firstly, it can be seen from the colinear network diagram that the bacterial  
211 community structure among all samples is similar (Figure S5). Secondly, the symbiotic  
212 relationship between dominant species in sole-Cultivated pattern is weak, the competition is  
213 relatively prominent, and the symbiotic network is relatively scattered and not concentrated  
214 (Figure 5a). However, in the two-cultivated pattern, the symbiotic relationship between

215 dominant species is significantly enhanced, while the competition relationship is significantly  
216 weakened. In addition, the symbiotic system formed among the dominant flora is closer and  
217 the symbiotic network is highly concentrated (Figure 5b). With the continuous increase of  
218 plant diversity, in the three-cultivated pattern, the symbiotic relationship between dominant  
219 species does not increase, but shows a downward trend. And the symbiotic network among  
220 species is more dispersed (Figure 5c). The results show that two-cultivated pattern is more  
221 conducive to improving soil microenvironment and creating a good living environment to  
222 resist Cr stress.

223

## 224 4. Discussion

### 225 4.1 Responses of environmental factors of rhizosphere soils and *I. pseudacorus* to Cr 226 stress

227 Excessive Cr in soil will inhibit plant growth and seriously threaten the health of soil  
228 ecosystem (Ao et al., 2022). Cr(VI) is characterized by high toxicity due to its strong  
229 bioavailability and mobility (Guo et al., 2020). It can inhibit plant photosynthesis, induce  
230 plant membrane lipid peroxidation and ROS production, thus affecting plant growth (Adhikari  
231 et al., 2020). In this study, compared with the control group, pH and EC values of rhizosphere  
232 soil physical and chemical properties showed an obvious upward trend with the addition of  
233 Cr(VI) (Figure 1), because soil properties (pH and EC) can significantly affect the adsorption  
234 effect of heavy metals (John et al., 2007). When the pH is low, the adsorption of heavy metals  
235 is reduced, resulting in the improvement of the bioavailability and mobility of heavy metals  
236 (Rieuwerts et al., 2006). Therefore, the increase of soil properties (pH and EC) may be related  
237 to the mechanism by which plants interact with their microenvironment to cope with heavy  
238 metal stress. Studies have proved that different pH conditions will significantly affect the  
239 reduction of Cr(VI) by microorganisms. When the optimum pH is reached, relevant functional  
240 genes will be significantly up-regulated. Then the pollutants can be completely removed, and  
241 the pathways for degradation and energy metabolism will be more abundant (Hua et al.,  
242 2020).

243 Due to the large amount of negative charge on the surface of organic matter, it plays an  
244 important role in the reduction of Cr(VI) (Praveen et al., 2019), so the presence of soil organic  
245 matter will significantly affect the properties of Cr. In this study, exogenous Cr significantly  
246 increased the SOM content (Figure 1). It may be that the plants under heavy metal Cr  
247 poisoning, can through the metabolism of the body itself produce chelating substances (such  
248 as organic acids, amino acids, protein, etc.). And these substances effectively alleviate the  
249 impact from Cr before entering into cells by the root secretion combining with heavy metals.  
250 At the same time, it can enhance the antioxidant defense mechanism in vivo and reduce the  
251 damage of reactive oxygen species produced under Cr stress (Zhong et al., 2019). It may also  
252 be related to the bacterial community in the soil, because the death of sensitive bacterial  
253 community under chromium stress can provide a large amount of organic matter to the soil  
254 (Sokol et al., 2022). And existing research shows that the SOM of the different functional  
255 groups, such as carbonyl and carboxyl, phenolic-OH etc. It can be combined with Cr(VI) (Shi  
256 et al., 2020), which was the main host phase for Cr (Saranya et al., 2021).

257 A large amount of Cr was accumulated in the roots and leaves of *I. pseudacorus* (Figure  
258 1), which was due to the good tolerance and enrichment of heavy metal stress in wetland  
259 plants themselves, which could fix Cr in the cell wall, cell membrane and vacuole in the form  
260 of chelates or complexes to reduce its toxicity (Wang et al., 2021). However, under the high

261 concentration of chromium stress, the stress mechanism of wetland plants was not enough to  
262 completely alleviate the oxidative stress caused by Cr, so the biomass of wetland plants  
263 decreased by 45.1% (Figure 1 ).

#### 264 **4.2 Effects of Cr stress on rhizosphere soil bacterial community structure and** 265 **diversity**

266 The structure and species diversity of rhizosphere bacterial communities play a very  
267 important role in soil ecosystem and plant regulation mechanism (Jin et al., 2018). In this  
268 study, we observed that the addition of exogenous Cr(VI) significantly decreased the Alpha  
269 diversity index (Sobs, Shannon, and Chao index) of the rhizosphere bacterial community in  
270 *I. pseudacorus* (Figure 2). Similar results have been observed by other researchers in studies  
271 of pinwheel rhizosphere microorganisms grown under Cr stress (Wang et al., 2021). This is  
272 because a large number of chrome-intolerant bacterial communities cannot alleviate the  
273 toxicity of Cr under the stress of high concentration of Cr, thus causing the damage of cell  
274 membrane function and their own metabolism, and dying due to the inability to maintain their  
275 own life activities (Sharma et al., 2021). It has also been observed that bacterial death may be  
276 due to competitive interactions between bacteria competing for resources in extreme  
277 environments (Sokol et al., 2022). When chromium enters cells through phosphate or sulfate  
278 carrier proteins, reducing enzymes and reducing substances in bacteria will reduce Cr(VI) to  
279 low-toxicity Cr(III), but during this period, reactive oxygen species and hydroxyl radicals will  
280 be produced in large quantities, thus inducing oxidative stress (Sharma et al., 2021). The  
281 strong oxidizing substances produced can cause DNA damage, which leads to cellular genetic  
282 variation and bacterial death (Guo et al., 2020), negatively affecting bacterial community  
283 diversity and abundance.

284 Cr stress significantly altered the spatial structure of bacterial communities in the  
285 rhizosphere soil of *I. pseudacorus* (Figure 3). Previous studies have shown that when the soil  
286 is contaminated with chromium, the bacterial community will exhibit obvious partitioning  
287 phenomenon, which significantly changes the spatial structure of the bacterial community in  
288 the soil (Yu et al., 2021b). This result has been confirmed in other studies (Wang et al., 2021;  
289 Wu et al., 2022 and Xiao et al., 2022). In this paper, PLS-DA (Figure 3) and Veen analyses  
290 (Figure. S3) proved that the addition of exogenous chromium could significantly change the  
291 structural composition and species number of bacterial communities. In conclusion, Cr stress  
292 can significantly reduce the diversity of rhizosphere bacterial community and change the  
293 structure of rhizosphere bacterial community, thus affecting the rhizosphere soils  
294 microenvironment.

#### 295 **4.3 Responses of rhizosphere soil bacterial communities to Cr stress and different** 296 **cultivation patterns**

297 In chrome-contaminated soils, previous studies have found the existence of Cr-reducing  
298 bacteria and tolerant bacteria, which play an important role in maintaining the stability of soil  
299 microenvironment and plant growth (Bhanset al., 2022). In this study, it was found that  
300 Proteobacteria, Actinobacteria, Firmicutes and Bacteroidetes showed an increasing trend in  
301 the overall abundance compared with the blank group (Figure 4). With the increase of plant  
302 diversity, the abundance of dominant bacteria in soil microenvironment increased  
303 significantly (Figure 4). This may be related to the introduction of plants, because plants  
304 secrete organic substances (soluble sugars, phenolic compounds, flavonoids and organic  
305 acids) through roots during growth, which provide sufficient nutrients for the growth of  
306 rhizosphere bacterial communities and improve the microenvironment (Wang et al., 2021).

307 The abundance of Proteobacteria, Gammaproteobacteria, Alphaproteobacteria, and  
308 Gemmatimonadetes increased after Cr stress (Figure S4). This is because Gemmatimonadetes  
309 and all Proteobacteria bacteria are gram negative bacteria. Their cell envelopes are composed  
310 of outer membrane (containing anion lipopolysaccharide, phospholipid and outer membrane  
311 protein) and peptidoglycan (He et al., 2020). Under the stimulation of Cr stress, it activates its  
312 own stress matrix and metabolic function, so as to release a large number of sugars and  
313 organic substances into the soil microenvironment to combine with heavy metals, reduce their  
314 bioavailability and toxicity, and create a good living environment. However, the abundance of  
315 Proteobacteria increased (Garavaglia et al., 2010). Actinobacteria, a typical gram-positive  
316 bacteria, plays an important role in the removal and reduction of Cr(VI), and has good  
317 tolerance to chromium, so that it can survive in chrome polluted soils (Ramesh et al., 2010).

318 In this paper, it was found that under the stimulation of chromium stress, two new  
319 dominant bacteria genera (Bacteroides and Pseudomonas) emerged (Figure 4). And  
320 Pseudomonas bacteria has a good reduction effect on Cr(VI) (Dogan et al., 2011). With the  
321 progress of technology, Pseudomonas sp. (Strain CPSB21) was obtained from  
322 chromium-contaminated wastewater by strain separation technology (Pratishtha et al., 2018),  
323 And it significantly promoted plant growth and antioxidant enzyme activity, and alleviated  
324 membrane lipid peroxidation. The results revealed that Pseudomonas NEWG-2 had a good  
325 effect on Cr(VI) removal by bioadsorption (Noura et al., 2020). Bacillus sp. CRB-B1 was an  
326 efficient Cr(VI) reducing bacterium (Tan et al., 2020).

327 The symbiosis network diagram in this paper showed that under sole-cultivated pattern  
328 and three-cultivated pattern, the synergism between dominant bacterial communities was  
329 weak, antagonism still existed, and the symbiosis network was relatively dispersed (Figure 5).  
330 This may be because under sole-cultivated pattern, plant diversity was less and carbon input  
331 to soil microbial community, which was not sufficient to construct a complete symbiosis  
332 system of rhizosphere microbial community (Lange et al., 2015). Under three-cultivated  
333 pattern, rhizosphere microbial community had stable carbon input, which may be because  
334 plants competed with each other to rob soil microbial resources, resulting in dispersed  
335 rhizosphere bacterial community and relatively dispersed symbiosis network constructed by  
336 bacterial community (Zhou et al., 2022). Among them, under two-cultivated pattern, not only  
337 the synergism between bacterial community was obviously strengthened, but also the  
338 symbiotic net formed was highly concentrated. It can be seen that under Cr stress,  
339 two-cultivated pattern was the optimal existence form (Figure 5).

340

## 341 5. Conclusions

342 The results showed that although there was a certain tolerance and enrichment of heavy  
343 metal Cr in *I. pseudacorus*, chromium still affected its environment and plant growth. In  
344 addition, the abundance and diversity of bacterial communities in the rhizosphere soils of *I.*  
345 *pseudacorus* were significantly decreased, and the spatial pattern of bacterial communities  
346 was significantly changed, affecting the composition of the rhizosphere bacterial  
347 communities. With the increase of plant diversity, the abundance of dominant species in soil  
348 microenvironment increased obviously, and beneficial bacteria appeared. Among them,  
349 two-cultivated pattern effectively changes the symbiotic relationship among the dominant  
350 species, significantly strengthens the synergistic effect between the dominant flora, and forms  
351 a more concentrated symbiotic network. The results of this study are helpful to further  
352 understand the effects of Cr stress on rhizosphere bacterial community, and provide reference



353 for ecological remediation of Cr-contaminated soils.

354

355

### 356 **Declaration of competing interest**

357 The authors declare that they have no known competing financial interests or personal  
358 relationships that could have appeared to influence the work reported in this paper.

359

360

### 361 **Acknowledgments**

362 This study is financially supported by the National Natural Science Foundation of China  
363 (31560107), and by the Science and Technology Support Project of Guizhou province, China  
364 (Guizhou Branch Support [2018]2807).

365

366

367

368

### 369 **References:**

370 Aashna, M., Abhay, B.F., Debjani, D., 2022. Recent developments in essentiality of  
371 trivalent chromium and toxicity of hexavalent chromium: Implications on human health and  
372 remediation strategies. *Journal of Hazardous Materials Advances*. 7, 100113.

373 Adhikari, A., Adhikari, S., Ghosh, S., et al., 2020. Imbalance of redox homeostasis and  
374 antioxidant defense status in maize under chromium (VI) stress. *Environmental and  
375 Experimental Botany*. 169, 103873.

376 Amina, E., Mehvish, A., Abdul, R., 2019. Isolation, characterization, and multiple heavy  
377 metal-resistant and hexavalent chromium-reducing *Microbacterium testaceum* B-HS2 from  
378 tannery effluent. *Journal of King Saud University-Science*. 31, 1437-1444.

379 Amit, P., Ajay, K., Zhong, H., 2018. Adverse effect of heavy metals (As, Pb, Hg, and Cr)  
380 on health and their bioremediation strategies: a review. *International microbiology: the  
381 official journal of the Spanish Society for Microbiology*. 21, 97-106.

382 Ao, M., Chen, X.T., Deng, T.H., et al., 2022. Chromium biogeochemical behaviour in  
383 soil-plant systems and remediation strategies: A critical review. *Journal of Hazardous  
384 Materials*. 424, 127233.

385 Bao, S.D., 2000. *Analytical Methods of Soil Agro-chemistry*. China agriculture press,  
386 Beijing (in Chinese).

387 Bhanse, P., Kumar, M., Singh, L., et al., 2022. Role of plant growth-promoting  
388 rhizobacteria in boosting the phytoremediation of stressed soils: Opportunities, challenges,  
389 and prospects. *Chemosphere*. 303, 134954.

390 Dogan, N.M., Kantar, C., Gulcan, S., et al., 2011. Chromium(VI) bioremoval by  
391 *Pseudomonas* bacteria: role of microbial exudates for natural attenuation and biotreatment of  
392 Cr(VI) contamination. *Environmental Science & Technology*. 45, 2278-2285.

393 Domeignoz-Horta, L.A., Pold, G., Liu, X.J.A., et al., 2020. Microbial diversity drives  
394 carbon use efficiency in a model soil. *Nature Communications*, 11, 3684.

395 Garavaglia, L., Cerdeira, S.B., Vullo, D.L., 2010. Chromium (VI) biotransformation by  
396  $\beta$ - and  $\gamma$ -Proteobacteria from natural polluted environments: a combined biological and  
397 chemical treatment for industrial wastes. *Journal of hazardous materials*. 175, 104-110.

398 Guo, S.Y., Xiao, C.Q., Zhou, N., et al., 2020. Speciation, toxicity, microbial remediation  
399 and phytoremediation of soil chromium contamination. *Environmental Chemistry Letters*.  
400 1-19.

401 Gupta, P., Kumar, V., Usmani, Z., et al. 2019. A comparative evaluation towards the  
402 potential of *Klebsiella* sp. and *Enterobacter* sp. in plant growth promotion, oxidative stress  
403 tolerance and chromium uptake in *Helianthus annuus* (L.). *Journal of Hazardous Materials*.  
404 377, 391-398.

405 He, C.W., Gu, L.P., Xu, Z.X., et al., 2020. Cleaning chromium pollution in aquatic  
406 environments by biore-mediation, photocatalytic remediation, electrochemical reme-diation  
407 and coupled remediation systems. *Environmental Chemistry Letters*. 18, 561-576.

408 Hu, S.S., Hu, B., Chen, Z.B., et al., 2020. Antioxidant response in arbuscular  
409 mycorrhizal fungi inoculated wetland plant under Cr stress. *Environmental Research*. 191,  
410 110203.

411 Hua, Y.T., Chen, N., Liu, T., 2020. The mechanism of nitrate-Cr(VI) reduction mediated  
412 by microbial under different initial pHs. *Journal of Hazardous Materials*. 393, 122434.

413 Huang, Y.J., Zeng, Q., Hu, L., et al., 2021. Bioreduction performances and mechanisms  
414 of Cr(VI) by *Sporosarcina saromensis* W5, a novel Cr(VI)-reducing facultative anaerobic  
415 bacteria. *Journal of Hazardous Materials*. 413, 125411.

416 Jin, Y.Y., Luan, Y., Ning, Y.C., 2018. Effects and Mechanisms of Microbial  
417 Remediation of Heavy Metals in Soil: A Critical Review. *Applied Sciences*. 8, 1336.

418 John, S.R., 2007. The mobility and bioavailability of trace metals in tropical soils: a  
419 review. *Chemical Speciation & Bioavailability*. 19, 75-85.

420 Kimbrough, D.E., Cohen, Y., Winer, A.M., et al. 1999. A critical assessment of  
421 chromium in the environment. *Critical Reviews in Environmental Science and Technology*.  
422 29, 1-46.

423 Lange, M., Eisenhauer, N., Carlos, A.S., et al., 2015. Plant diversity increases soil  
424 microbial activity and soil carbon storage. *Nature communications*. 6, 6707.

425 Lin, H., Liu, J., Dong, Y., et al., 2018. Absorption characteristics of com-pound heavy  
426 metals vanadium, chromium, and cadmium in water by emergent macrophytes and its  
427 combinations. *Environmental Science and Pollution Research*. 25, 17820-17829.

428 Lin, W.H., Chen, S.C., Chien, C.C., et al., 2020. Application of enhanced bioreduction  
429 for hexavalent chromium-polluted groundwater cleanup: Microcosm and microbial diversity  
430 studies. *Environmental Research*. 184, 109296.

431 Losi, M.E., Amrhein, C., Frankenberger, W.T., 1994. Environmental biochemistry of  
432 chromium. *Reviews of Environmental Contamination and Toxicology*. 136, 91-121.

433 Muthusarayanan, S., Sivarajasekar, N., Vivek, J.S., et al., 2018. Phytoremediation of  
434 heavy metals: mechanisms, methods and enhancements. *Environmental Chemistry Letters*.  
435 16, 1339-1359.

436 Noura, E.A.E.N., Ayman, Y.E.K., Abeer, A.G., et al., 2020. innovative low-cost  
437 biosorption process of Cr<sup>6+</sup> by *Pseudomonas alcaliphila* NEWG-2. *Scientific Reports*. 10,  
438 14043.

439 Panda, S.K., Choudhury, S., 2005. Chromium stress in plants. *Brazilian Journal of Plant  
440 Physiology*, 17, 95-102.

441 Peng, H., Guo, J., 2020. Removal of chromium from wastewater by mem-brane  
442 filtration, chemical precipitation, ion exchange, adsorp-tion electrocoagulation,  
443 electrochemical reduction, electrodi-alysis, electrodeionization, photocatalysis and

- 444 nanotechnology: a review. *Environmental Chemistry Letters*.
- 445 Pratishta, G., Rupa, R., Avantika, C & Vipin, K., 2018. Potential applications of  
446 *Pseudomonas* sp. (strain CPSB21) to ameliorate Cr<sup>6+</sup> stress and phytoremediation of tannery  
447 effluent contaminated agricultural soils. *Scientific Reports*. 8, 4860.
- 448 Praveen, K., Jayanti, T & H.R. Singal., 2019. Amelioration of chromium Vi toxicity in  
449 *Sorghum* (*Sorghum bicolor* L.) using Glycine Betaine. *Scientific Reports*. 9, 16020.
- 450 Rai, V., Vajpayee, P., Singh, S.N., et al. 2004. Effect of chromium accumulation on  
451 photosynthetic pigments, oxidative stress defense system, nitrate reduction, proline level and  
452 eugenol content of *Ocimum tenuiflorum* L. *Plant Science*. 167, 1159-1169.
- 453 Ramesh, C.P., Seidu, M., Michael, B., et al., 2010. Molecular characterization of  
454 chromium (VI) reducing potential in Gram positive bacteria isolated from contaminated sites.  
455 *Soil Biology & Biochemistry*. 42, 1857-1863.
- 456 Rieuwerts, J.S., Ashmore, M.R., Farago, M.E. & Thornton, I., 2006. The influence of  
457 soil characteristics on the extractability of Cd, Pb, and Zn in upland and moorland soils.  
458 *Science of The Total Environment*. 366, 864-875.
- 459 Salas-González, I., Reyt, G., Flis, P., et al., 2020. Coordination between microbiota and  
460 root endodermis supports plant mineral nutrient homeostasis. *Science*. 371, 6525.
- 461 Saranya, J., Parthasarathi, C., Arindam, S., 2021. Post depositional changes of  
462 sedimentary organic matter influence chromium speciation in continental slope sediments-A  
463 case study. *Science of the Total Environment*. 777, 145783.
- 464 Sharma, P., 2021. Efficiency of bacteria and bacterial assisted phytoremediation of heavy  
465 metals: An update. *J. Bioresource Technology*. 328, 124835.
- 466 Shi, Z., Peng, S., Lin, X., et al., 2020. Predicting Cr (vi) adsorption on soils: the role of  
467 the competition of soil organic matter. *Environmental Science: Processes & Impacts* 22,  
468 95-104.
- 469 Sokol, N.W., Slessarev, E., Marschmann, G.L., et al., 2022. Life and death in the soil  
470 microbiome: how ecological processes influence biogeochemistry. *Nature Reviews*  
471 *Microbiology*. 22, 273-289.
- 472 Sundaresan, V., Finkel, O.M., Salas-González, I., et al., 2019. The effects of soil  
473 phosphorus content on plant mi-crobiota are driven by the plant phosphate starvation  
474 response. *PLoS Biology*. 17, e3000534.
- 475 Tan, H., Wang, C., Zeng, G.Q., et al., 2020. Bioreduction and biosorption of Cr(VI) by a  
476 novel *Bacillus* sp. CRB-B1 strain. *Journal of Hazardous Materials*. 386, 12162.
- 477 Wang, B.C., Zhu, S.X., Li, W.J., et al., 2021. Effects of chromium stress on the  
478 rhizosphere microbial community composition of *Cyperus alternifolius*. *Ecotoxicology and*  
479 *Environmental Safety*, 218, 112253.
- 480 Wu, B.H., Luo, H.Y., Wang, X.T., et al., 2022. Effects of environmental factors on soil  
481 bacterial community structure and diversity in different contaminated districts of Southwest  
482 China mine tailings. *Science of the Total Environment*. 802, 149899.
- 483 Xiao, W.W., Lin, G.B., He, X.M., et al., 2022. Interactions among heavy metal  
484 bioaccessibility, soil properties and microbial community in phyto-remediated soils nearby an  
485 abandoned realgar mine. *Chemosphere*. 286, 131638.
- 486 Xing, S.P., Chen, B.D., Hao, Z.P., et al., 2021. The Role of Rhizosphere Microorganisms  
487 in Enhancing Chromium Tolerance of Host Plants. *Asian Journal of Ecotoxicology*. 16, 2-14.
- 488 Yaashikaa, P.R., Senthil Kumar, P., Jeevanantham, S., et al., 2022. A review on  
489 bioremediation approach for heavy metal detoxification and accumulation in plants.

490 Environmental Pollution. 301, 119035.

491 Yu, R.L., Meilian, M., Yu, Z.J., et al., 2021a. A high-efficiency *Klebsiella variicola*  
492 H12-CMC-FeS@ biochar for chromium removal from aqueous solution. *Nature Reviews*  
493 *Microbiology*. 11, 6611.

494 Yu, H., An, Y.J., Jin, D.C., et al., 2021b. Effects of Chromium Pollution on Soil  
495 Bacterial Community Structure and Assembly Processes. *Environmental Science*. 42,  
496 1197-1204.

497 Zaheer I.E., Shafaqat, A., Muhammad, H.S., et al., 2020. Role of iron-lysine on  
498 morpho-physiological traits and combating chromium toxicity in rapeseed (*Brassica napus* L.)  
499 plants irrigated with different levels of tannery wastewater. *Plant Physiology and*  
500 *Biochemistry*. 155, 70-84 .

501 Zhang, X.X., Zhang, R.J., Gao, J.S., et al., 2017. Thirty-one years of rice-rice-green  
502 manure rotations shape the rhizosphere microbial community and enrich beneficial bacteria.  
503 *Soil Biology and Biochemistry*. 208-217.

504 Zhang, J., Liu, Y.X., Zhang, N., et al., 2019. NRT1.1B is associated with root microbiota  
505 composition and nitrogen use in field-grown rice. *Nature Biotechnology*. 37, 676-684.

506 Zhong, M.Y., Zhang, X.Y., Yang, X.Y., et al., 2019. Recent advances in plant response  
507 to chromium stress. *Pratacultural Science*. 36, 1962-1975.

508 Zhou, Z.B., Zhang, Y.J., Zhang, F., 2022. Abundant and rare bacteria possess different  
509 diversity and function in crop monoculture and rotation systems across regional farmland.  
510 *Soil Biology and Biochemistry*. 171, 108742.

Fig. 1 Plant physiological parameters and chemical properties of soil under Cr stress (a. EC; b. pH; c. SOM, d. Fresh weight; e. Root chromium content; f. Chromium content in foliage; \* $p < 0.05$ , \*\* $p < 0.01$ , and \*\*\* $p < 0.001$ ). The results showed that there were significant differences in physicochemical properties between the control group and the polluted group. Error bars refer to standard errors. Control contains treatments of IPI, IPII and IPIII, contamination contains treatments of CrIPI, CrIPII and CrIPIII.

Fig. 2 Comparison of bacterial community diversity and abundance index between control and contaminated groups (a. Shannon index; b. Chao index; c. Sobs index; \* $p < 0.05$ , \*\* $p < 0.01$ , and \*\*\* $p < 0.001$ ). The results showed that there were significant differences between the control group and the contaminated group. Error bars are outliers. Control contains treatments of IPI, IPII and IPIII, Contamination contains treatments of CrIPI, CrIPII and CrIPIII.

bioRxiv preprint doi: <https://doi.org/10.1101/2022.08.11.503686>; this version posted August 12, 2022. The copyright holder for this preprint (which was not certified by peer review) is the author/funder, who has granted bioRxiv a license to display the preprint in perpetuity. It is made available under aCC-BY 4.0 International license.

Fig. 3 PCoA analysis on weighted UniFrac distance (a), PLS-DA analysis (b), which based on OTUs at a 97% similarity level. PLS-DA performance of differentiation judges the potential interference factors, followed by OTUs at a 97% similarity degree. Comp1 and Comp2 respectively represent the suspected affecting factors for the deviation of microbial composition. Control contains treatments of IPI, IPII and IPIII, Contamination contains treatments of CrIPI, CrIPII and CrIPIII.

Fig. 4 Structure and difference of bacterial community at class level under chromium stress (a: Phylum level; b: Genus level). The small semicircle (left half circle) represents the species composition in the sample. The color of the outer band represents the group from which the species are from. The color of the inner band represents the species, and the length represents the relative abundance of the species in the corresponding sample. The large semicircle (right half circle) represents the distribution ratio of species in different samples at the taxonomic level. The outer band represents species, the inner band color represents different groups, and the length represents the distribution ratio of the sample in a certain species.. A, C and E were the control group without Cr in *Iris pseudacorus* single, double and three plants, respectively. B, D and F were polluted groups with *I. pseudacorus* single, double and triple Cr treatments, respectively. G is for unplanted and bulk soil (CK).

Fig. 5 Symbiotic network diagram of soil rhizosphere microbial community (a: Sole plant model of *I. pseudacorus*; b: Double planting model of *I. pseudacorus*; c: Three planting model of *I. pseudacorus*). The size of nodes in the figure indicates the abundance of species, and different colors indicate different species. The color of the line indicates positive and negative correlation, red indicates positive correlation, and green indicates negative correlation. The thickness of the line indicates the correlation coefficient. The thicker the line, the higher the correlation between species. The more lines, the more closely related the species is to other species.

Figure 6 Schematic diagram of response mechanism of plant-microbe symbiosis system under Cr stress. (I) Plant stress mechanism; (II) Plant - bacterial symbiosis; (III) Bacterial stress mechanism. When treated with Cr, the plant will activate its own stress mechanism to respond to the external stress, thereby secreting a large amount of amino acids, organic acids, soluble sugar,

and phenols. The content of organic matter in soil was increased, the microenvironment was improved, and the abundance of bacterial community was increased. When bacteria were subjected to Cr stress, It can reduce the toxicity of Cr by biotransformation, biosorption, bioaccumulation, biomethylation, biodegradation and other stress mechanisms, so as to reduce the toxicity of contaminated soil to plants.

Figure 1

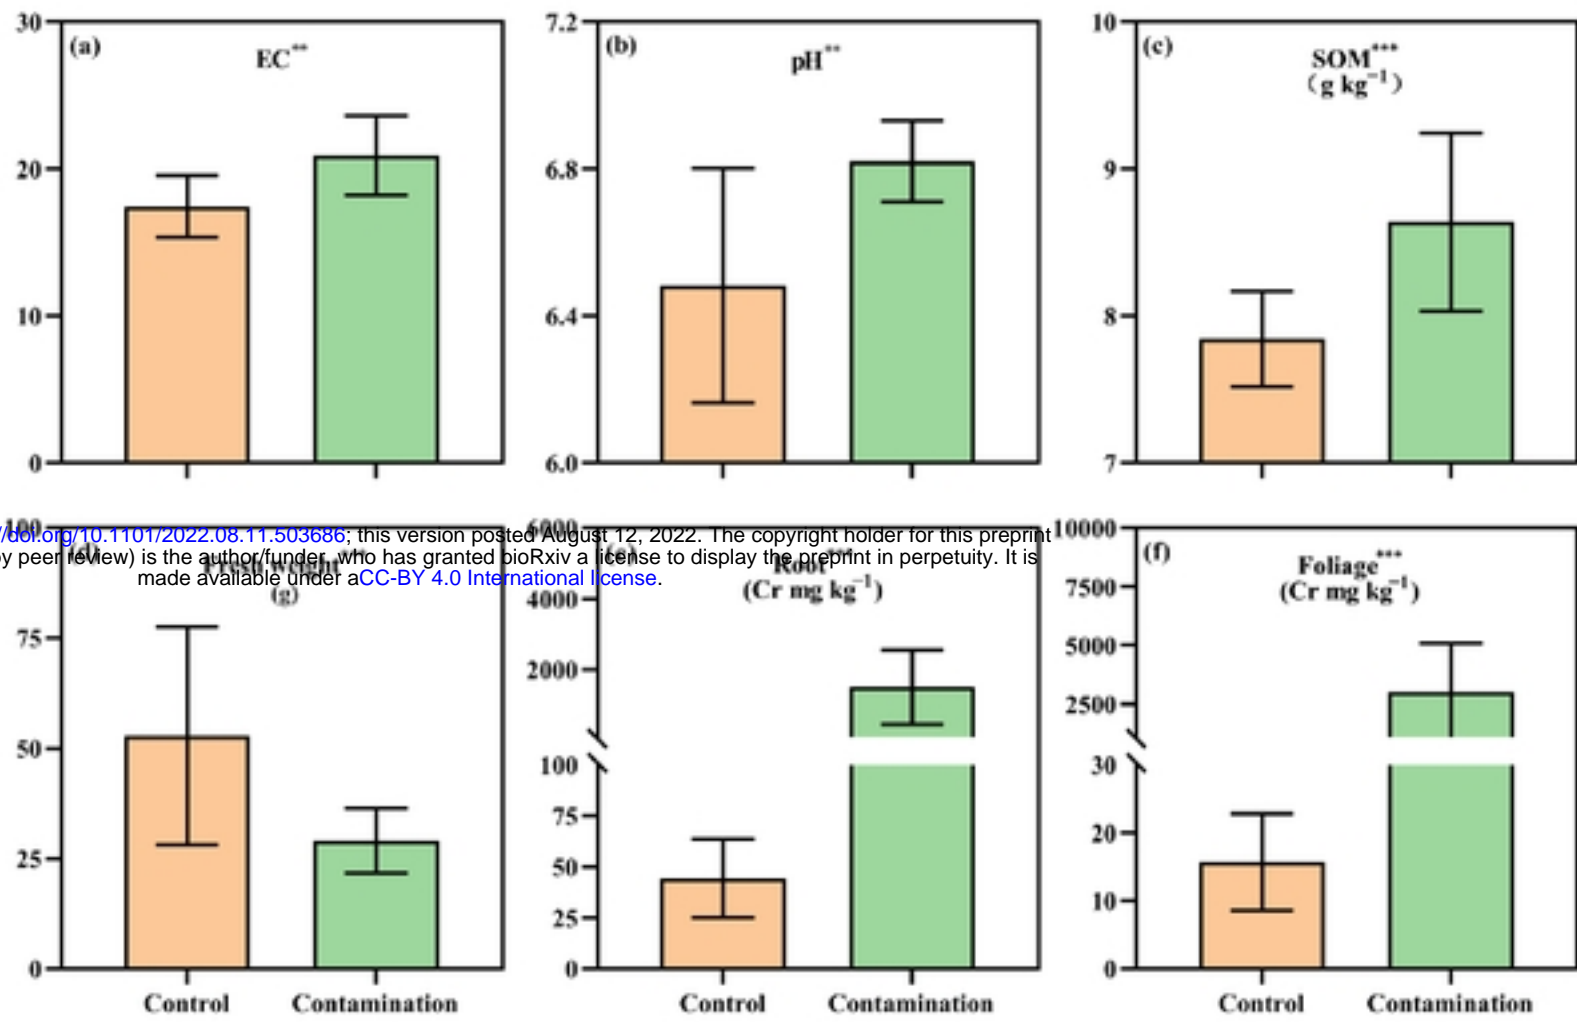

bioRxiv preprint doi: <https://doi.org/10.1101/2022.08.11.503686>; this version posted August 12, 2022. The copyright holder for this preprint (which was not certified by peer review) is the author/funder, who has granted bioRxiv a license to display the preprint in perpetuity. It is made available under aCC-BY 4.0 International license.

**Figure 2**

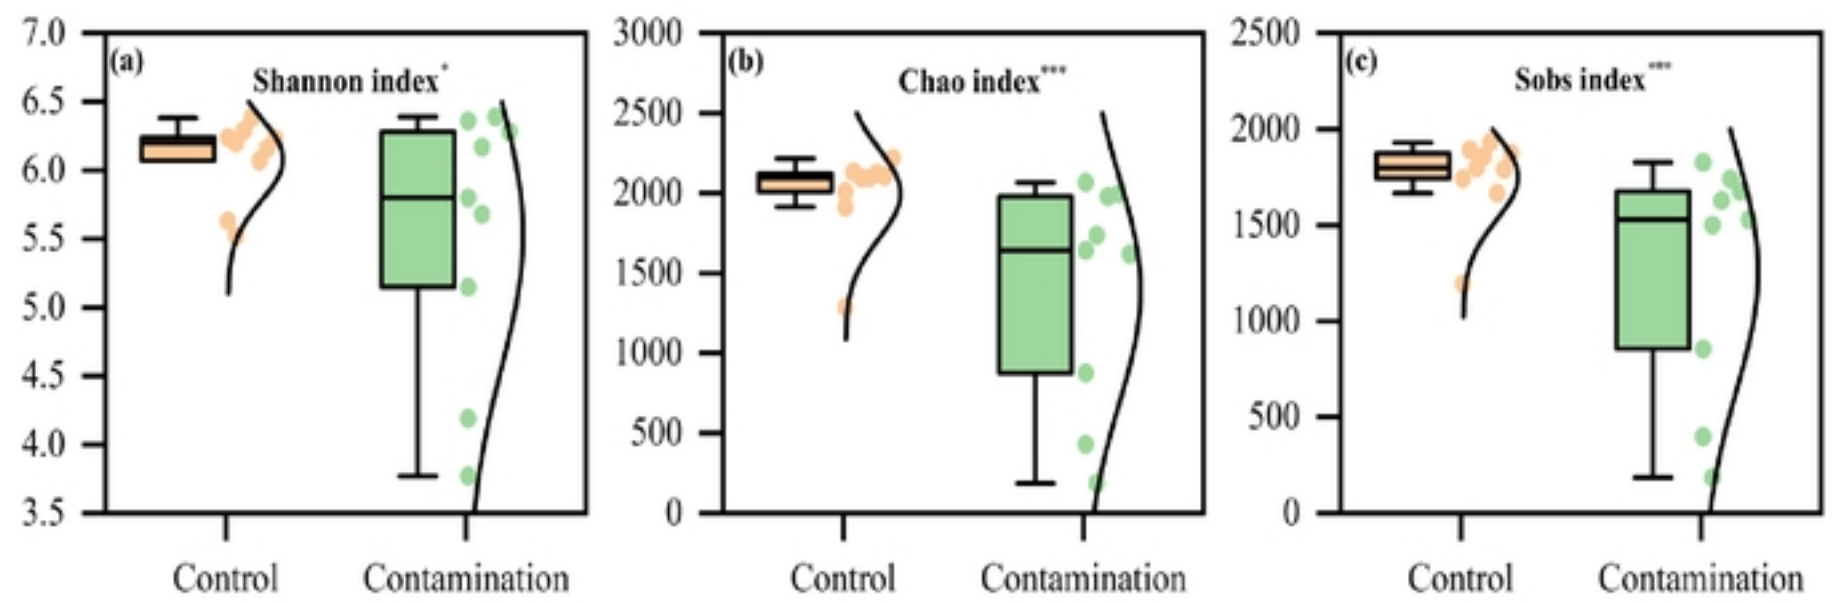

bioRxiv preprint doi: <https://doi.org/10.1101/2022.08.11.503686>; this version posted August 12, 2022. The copyright holder for this preprint (which was not certified by peer review) is the author/funder, who has granted bioRxiv a license to display the preprint in perpetuity. It is made available under aCC-BY 4.0 International license.



**Figure 3**

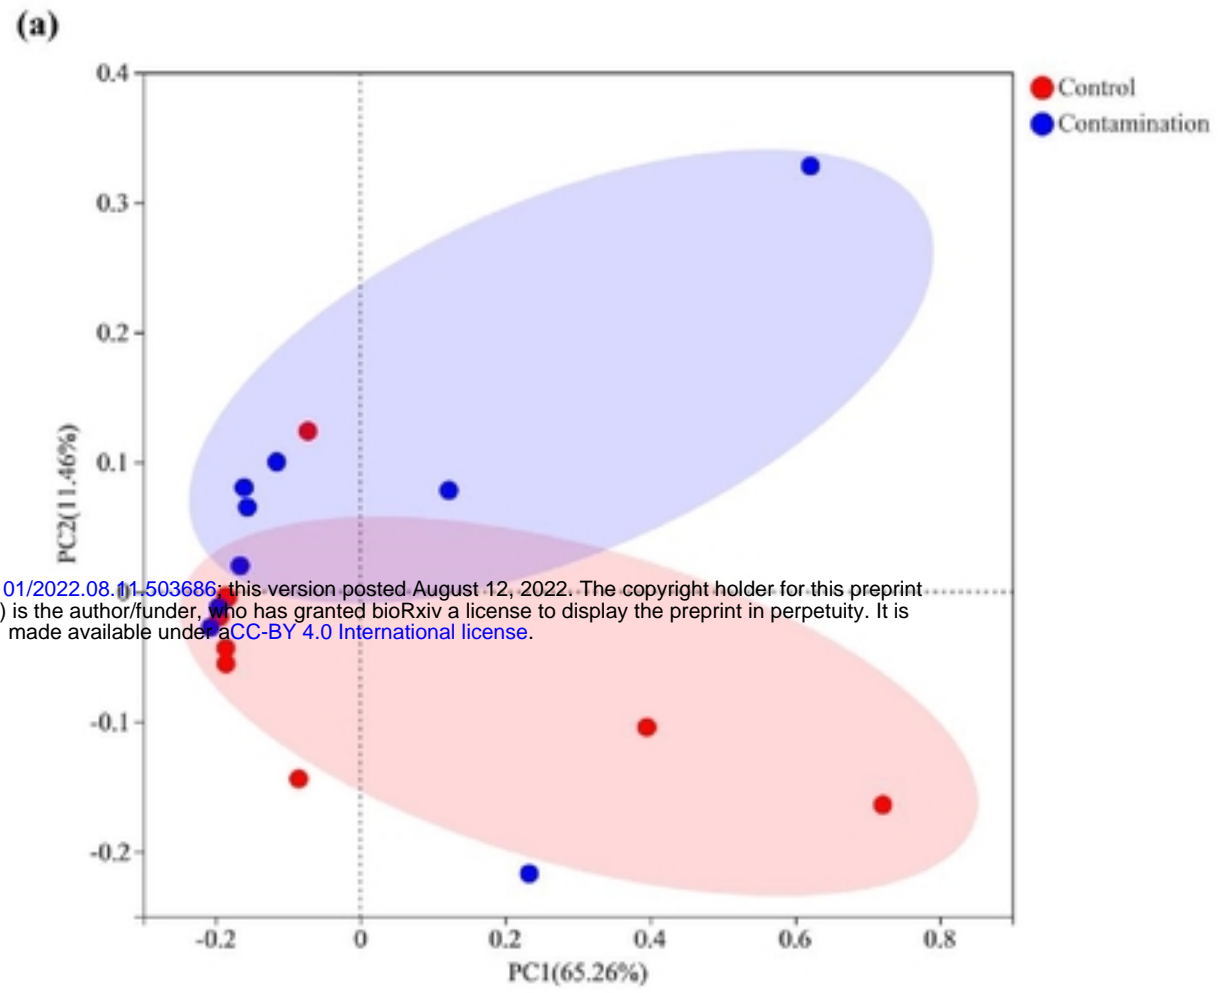

bioRxiv preprint doi: <https://doi.org/10.1101/2022.08.11.503686>; this version posted August 12, 2022. The copyright holder for this preprint (which was not certified by peer review) is the author/funder, who has granted bioRxiv a license to display the preprint in perpetuity. It is made available under aCC-BY 4.0 International license.

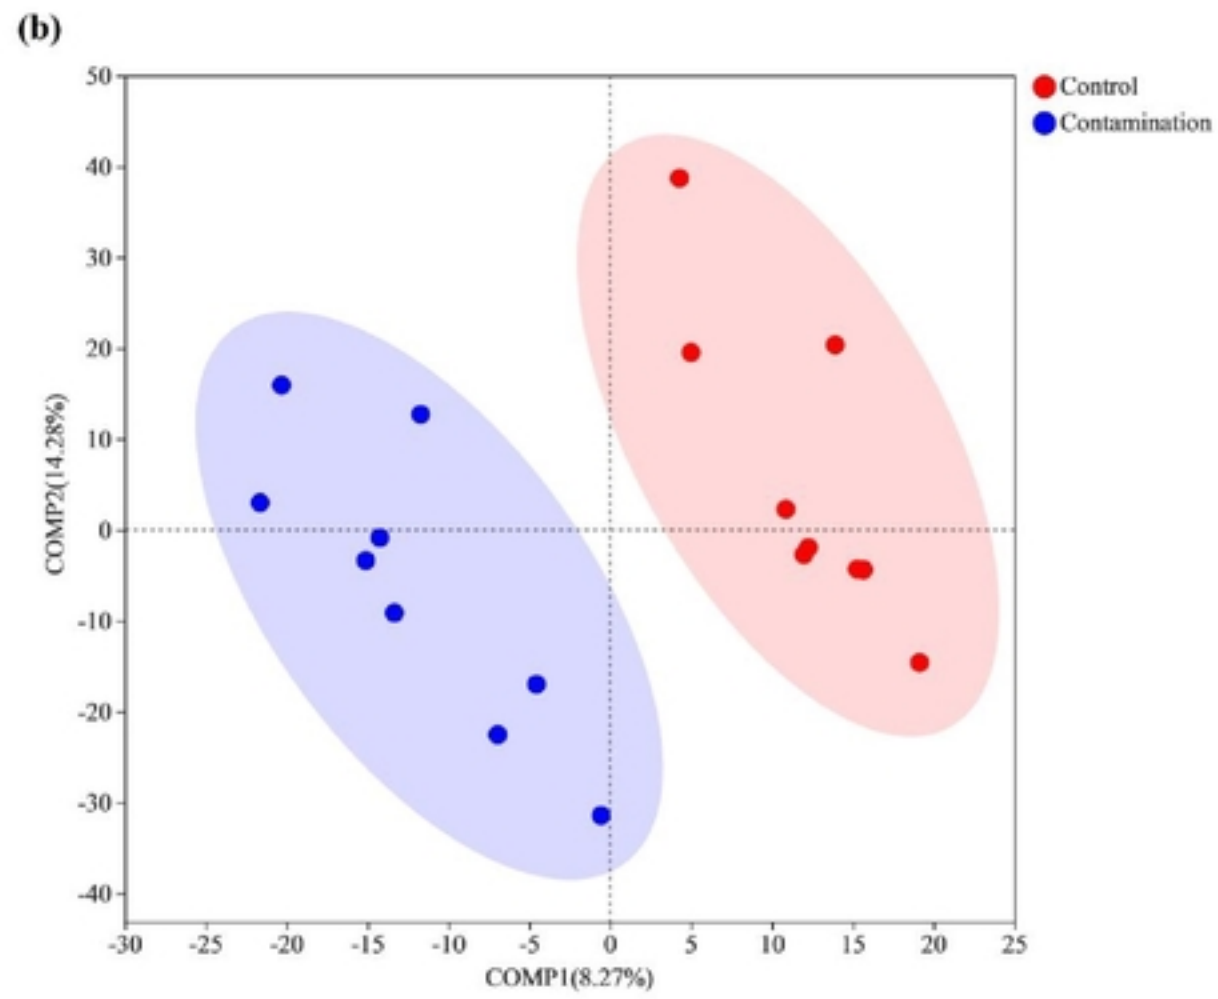

Figure 4

(a)

bioRxiv preprint doi: <https://doi.org/10.1101/2022.08.11.503686>; this version posted August 12, 2022. The copyright holder for this preprint (which was not certified by peer review) is the author/funder, who has granted bioRxiv a license to display the preprint in perpetuity. It is made available under aCC-BY 4.0 International license.

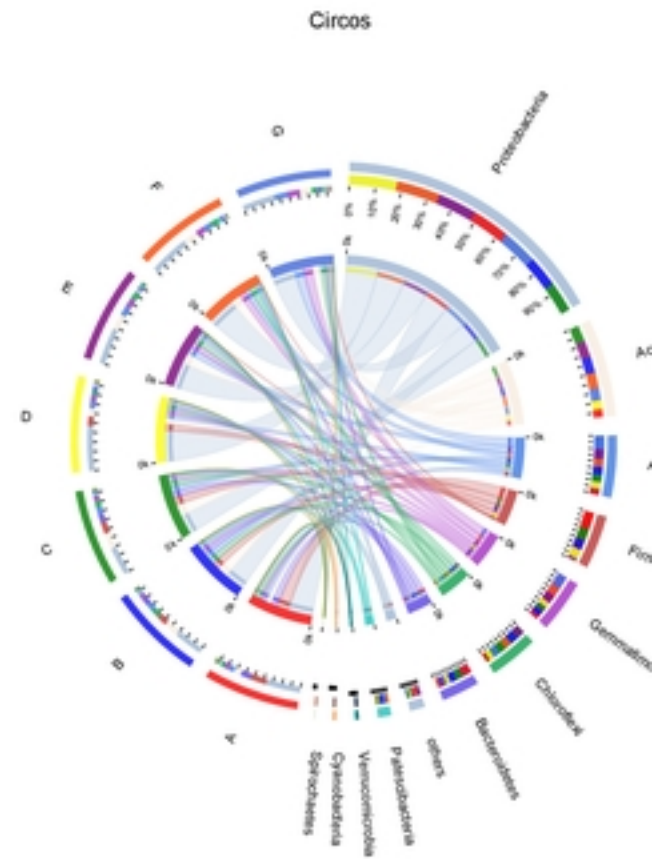

(b)

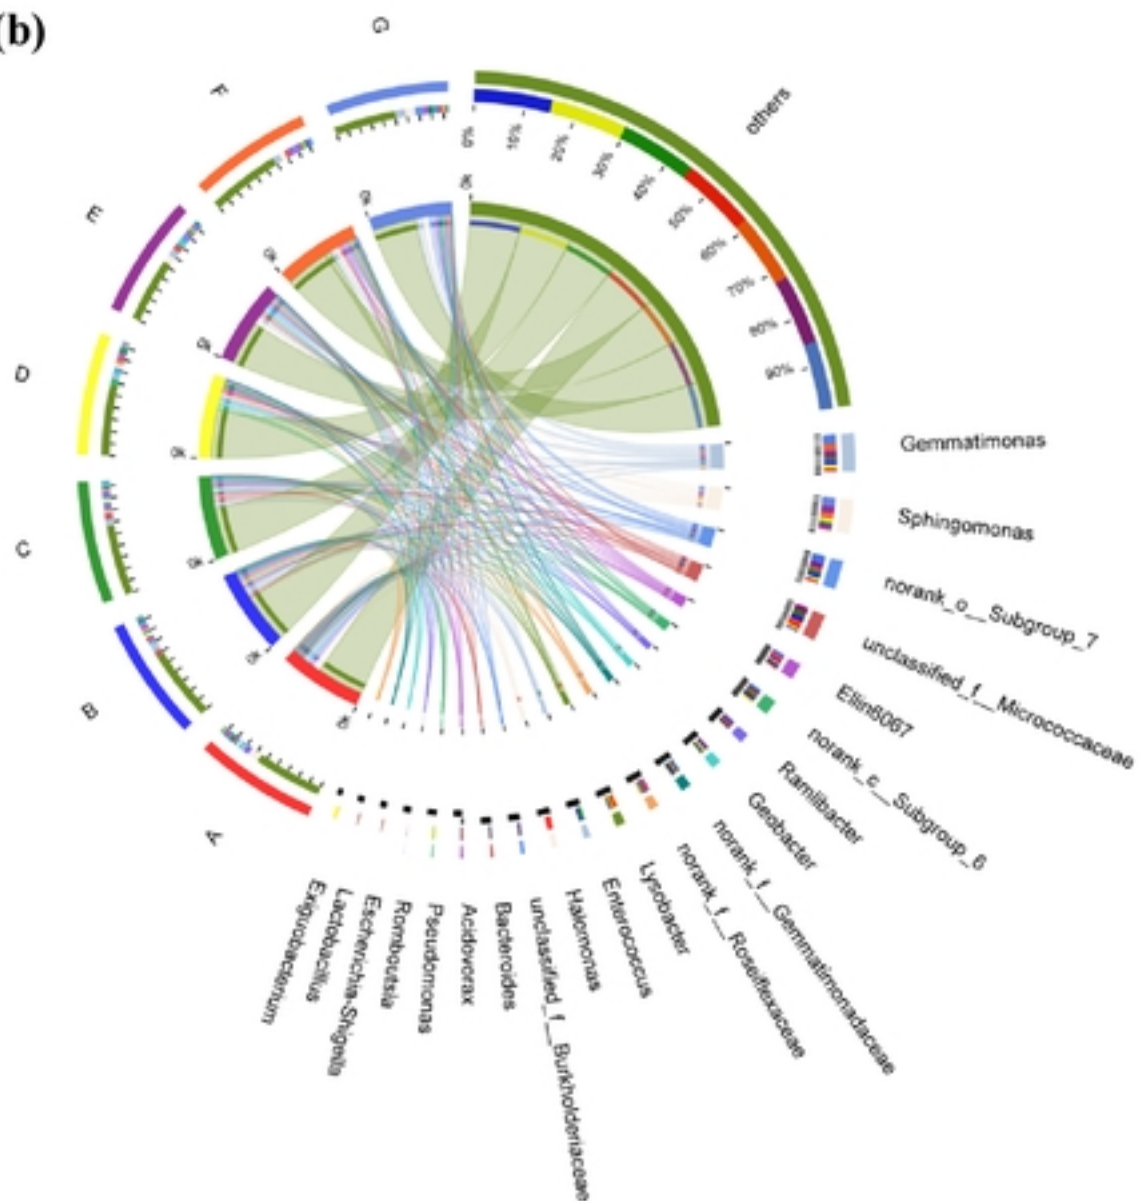

Figure 5

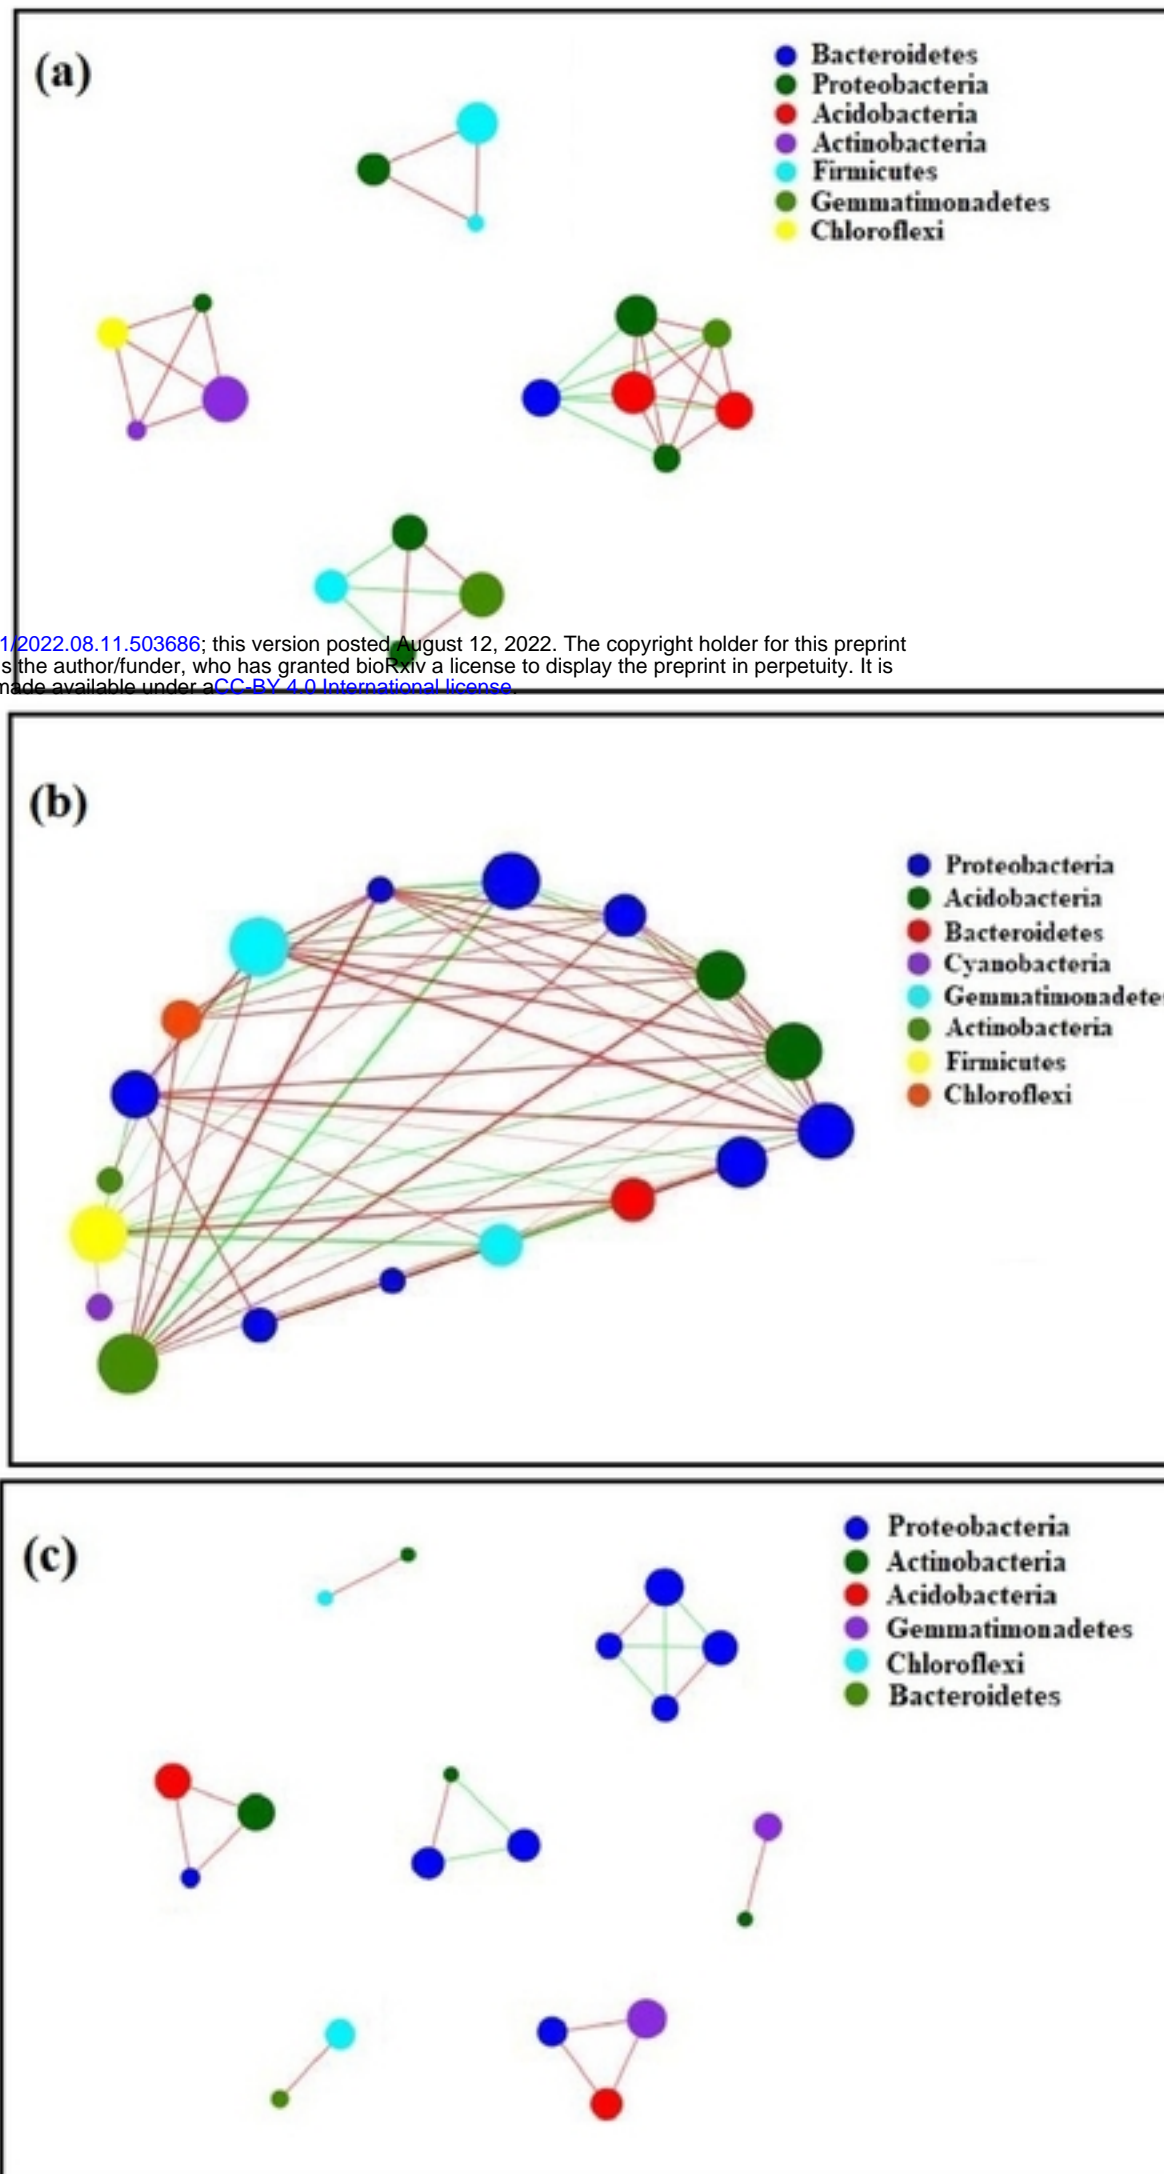

bioRxiv preprint doi: <https://doi.org/10.1101/2022.08.11.503686>; this version posted August 12, 2022. The copyright holder for this preprint (which was not certified by peer review) is the author/funder, who has granted bioRxiv a license to display the preprint in perpetuity. It is made available under aCC-BY 4.0 International license.

Figure 6

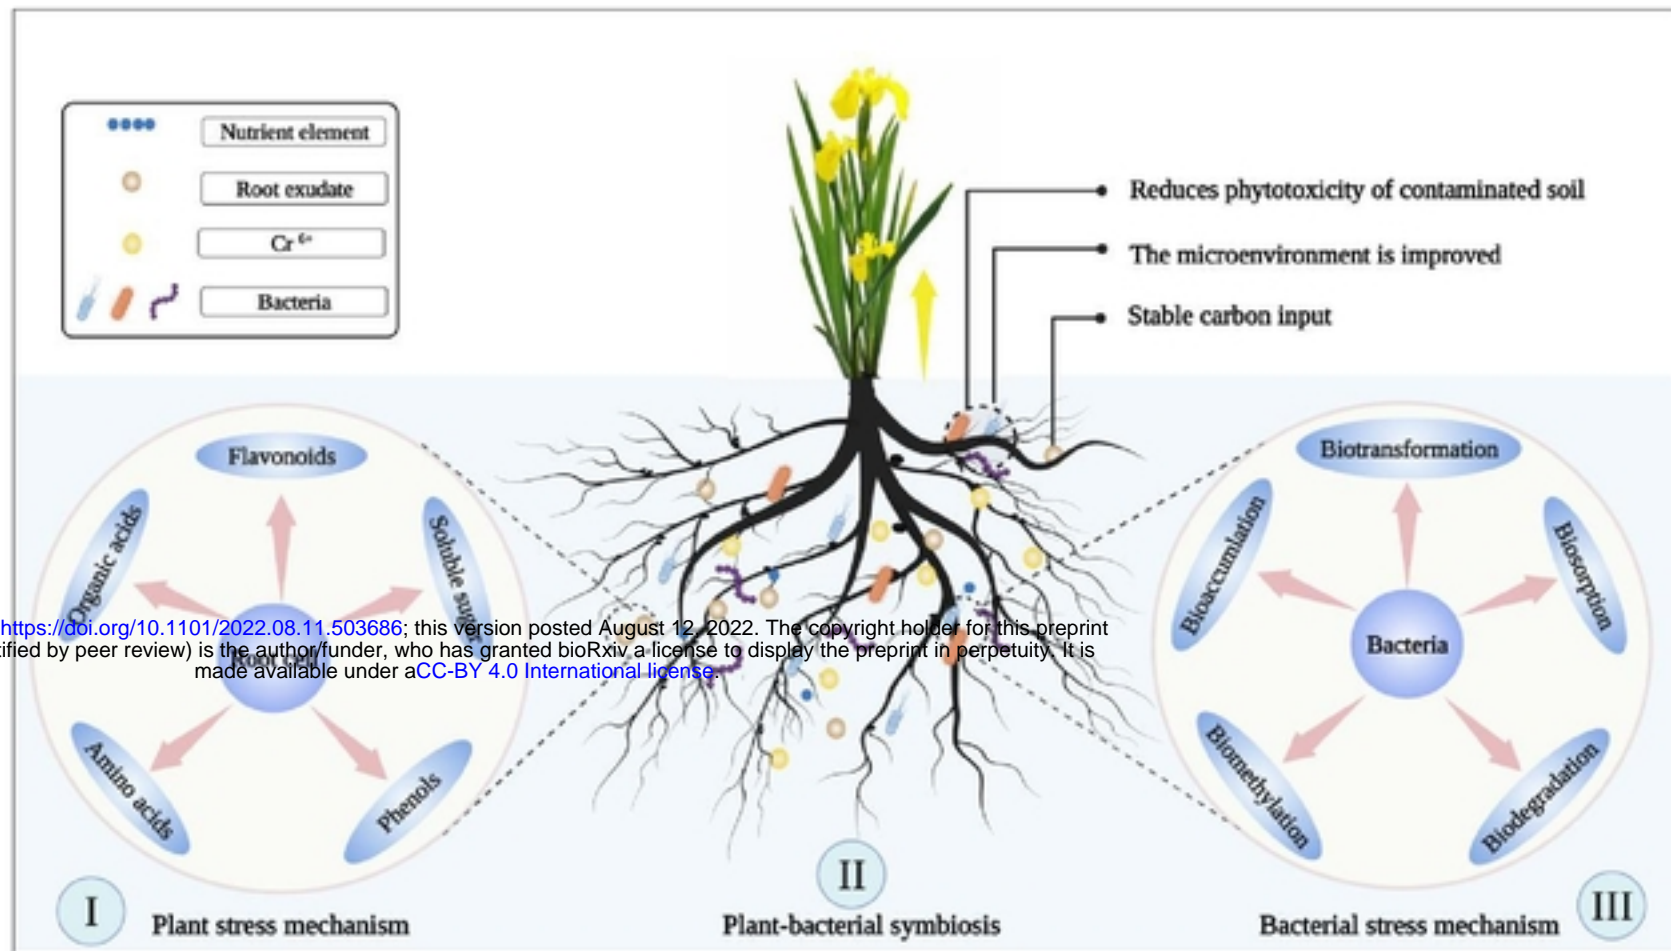

Source: https://www.biorxiv.org/content/10.1101/2022.08.11.503686v1.full.pdf
